# Supplementary material for: Proteome-wide modulation of degradation dynamics in response to growth arrest
Source: PubMed Central journal article supplement — Proc Natl Acad Sci U S A. 2017 Nov 13;114(48):E10329–38. doi: 10.1073/pnas.1710238114 (PMC5715755; doi:10.1073/pnas.1710238114), 2017-11-13
Supplement: pnas.201710238SI.pdf [file pnas.201710238SI.pdf]

# Supporting Information

Zhang et al. 10.1073/pnas.1710238114

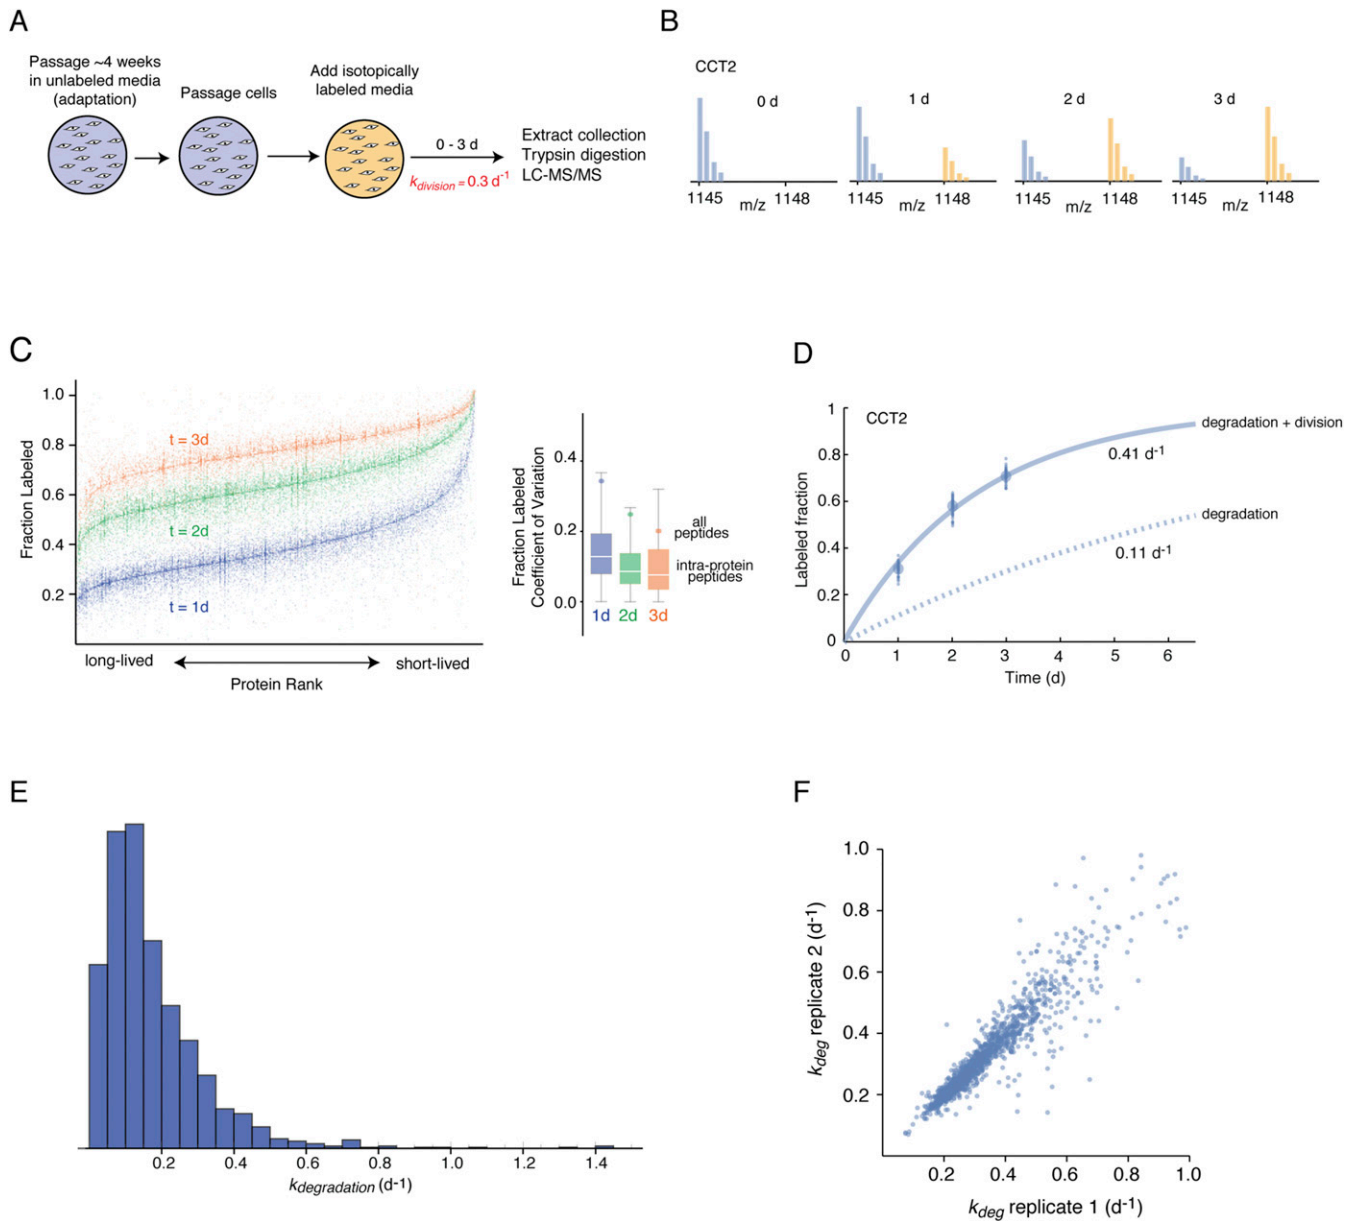

**Fig. S1.** Proteome-wide measurement of degradation rates in dividing fibroblasts. (A) Experimental design of dynamic SILAC experiments. (B) Example spectra showing the time-dependent labeling of a peptide mapped to CCT2. Blue and orange peaks indicate the unlabeled and labeled peptides, respectively. (C) Rank-size distribution plots showing the fractional labeling of peptides matched to each protein within the proteome at different time points for dividing fibroblasts. Note that the range of measured fractional labeling for peptides within each protein is significantly narrower than the entire range of measured peptides. The box plots indicate the range of coefficient of variations (CVs) for measured fractional labeling of peptides mapped to the same protein. The dots indicate the CV for all peptides at a given time point. (D) Labeling kinetics of CCT2. Small dots indicate all peptides mapped to the protein, and the large dots indicated the median of all peptides. The lines are fits to exponential equations based on the model described in *Materials and Methods*. The dotted line indicates the theoretical degradation kinetics of the protein after subtraction of the division rate from the total clearance rate. (E) The distribution of  $k_{\text{degradation}}$  measurements in dividing cells. (F) Biologically replicate measurements of  $k_{\text{degradation}}$ , indicating the precision of experiments.



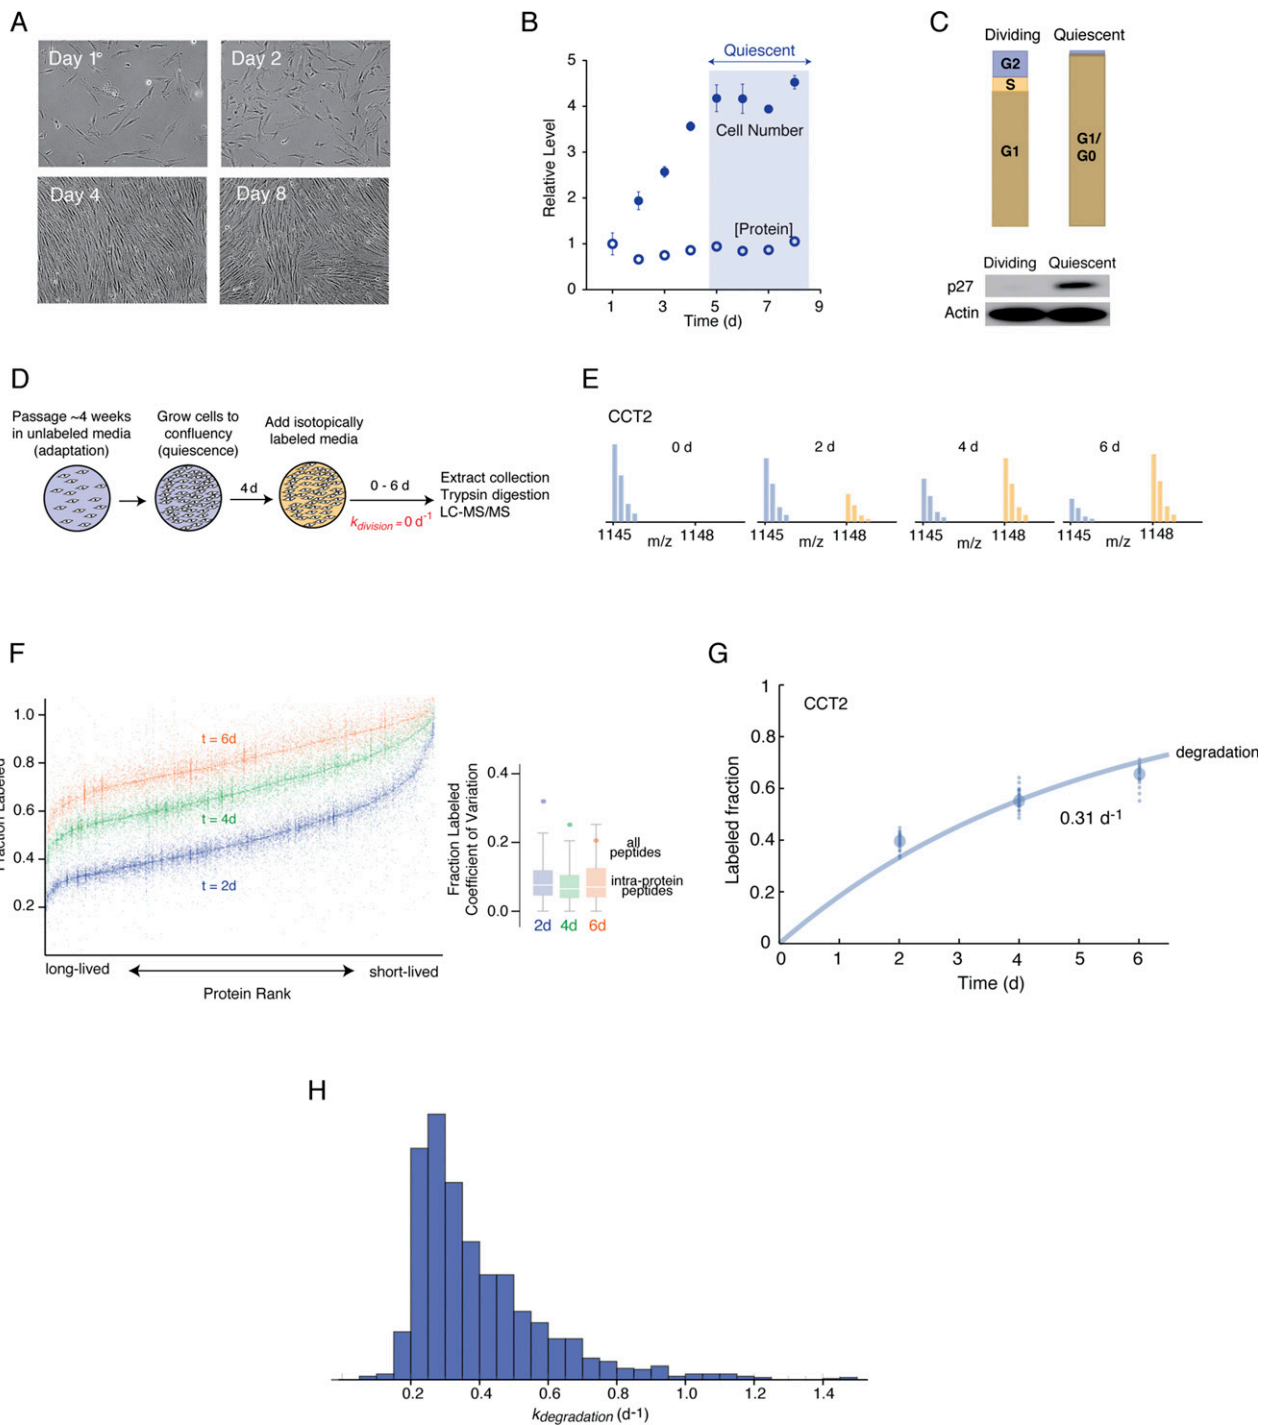

**Fig. S3.** Proteome-wide measurement of degradation rates in quiescent fibroblasts. (A) The transition of fibroblasts from a dividing to a contact-inhibited quiescent state. (B) Upon quiescence, [protein] per cell remains approximately constant despite the absence of cytoplasmic dilution by cell division. (C) FACS analysis of DNA content indicates that contact-inhibited fibroblasts are primarily in a G1/G0 state. The quiescent status of cells was verified by Western blot showing the up-regulation of the quiescence marker p27 in contact-inhibited cells. (D) Experimental design of dynamic SILAC experiments for measurement of degradation rates in quiescent cells. (E) Example spectra showing the time-dependent labeling of a peptide mapped to CCT2. (F) Rank-size distribution plots showing the fractional labeling of peptides mapped to different proteins. Refer to Fig. S1 for details. (G) Labeling kinetics of CCT2. Refer to Fig. S1 for details. (H) The distribution of  $k_{\text{degradation}}$  measurements in quiescent cells.



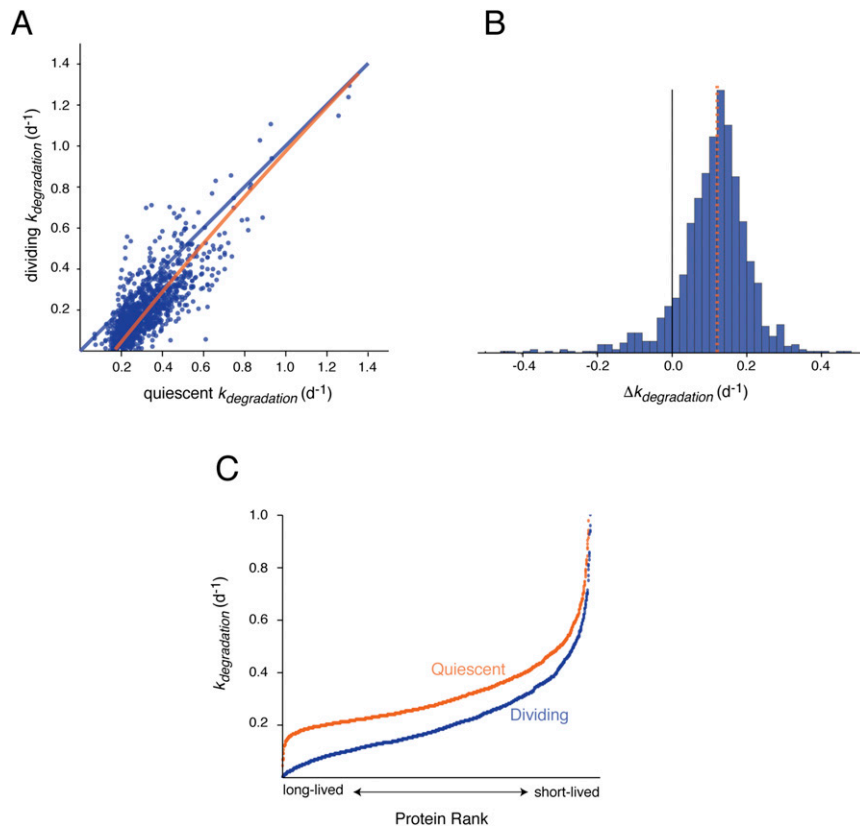

**Fig. S5.** Differences in protein  $k_{degradation}$  between dividing and quiescent fibroblasts. (A) Pairwise comparison of  $k_{degradation}$  measurements between quiescent and dividing cells. The blue line indicates the identity line, and the orange line indicates the best polynomial fit line to the data. (B) The distribution of differences in  $k_{degradation}$  between quiescent and dividing cells ( $\Delta k_{degradation}$ ). (C) Rank–size distribution plots of  $k_{degradation}$  measurements in quiescent and dividing cells. Note that the differences in  $k_{degradation}$  between the two states are significantly greater for long-lived proteins.





**Dataset S1.** Dynamic SILAC peptide and protein level data for dividing wild-type, quiescent wild-type, quiescent  $ATG5^{-/-}$ , dividing  $ATG5^{-/-}$ , quiescent PSME knockdown, and dividing PSME knockdown cells (related to Figs. 2 and 4)

[Dataset S1](#)

**Dataset S2.** Steady-state SILAC comparison between dividing and quiescent wild-type cells (related to Fig. 3)

[Dataset S2](#)

**Dataset S3.** Steady-state RNA-Seq comparison between dividing and quiescent wild-type cells, (related to Fig. 3)

[Dataset S3](#)

**Dataset S4.** GO analysis for steady-state SILAC and RNA-seq (related to Fig. 3)

[Dataset S4](#)
